# Supplementary material for: Electrodeposition of CoxNiVyOz Ternary Nanopetals on Bare and rGO-Coated Nickel Foam for High-Performance Supercapacitor Application
Source: MDPI journal article supplement (doi:10.3390/nano12111894), 2022-05-31
Supplement: s1 [file s1]

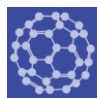

## Supplementary Materials

# Electrodeposition of $\text{Co}_x\text{NiV}_y\text{O}_z$ Ternary Nanopetals on Bare and rGO-Coated Nickel Foam for High-Performance Supercapacitor Application

Seyedeh Mozhgan Seyed-Talebi <sup>1,\*</sup>, Mohsen Cheraghizade <sup>2</sup>, Javad Beheshtian <sup>3</sup>, Chun-Hsiao Kuan <sup>1</sup>  
and Eric Wei-Guang Diau <sup>1,4,\*</sup>

<sup>1</sup> Department of Applied Chemistry, National Yang-Ming Chiao Tung University, Hsinchu 300093, Taiwan

<sup>2</sup> Advanced Surface Engineering and Nano Materials Research Center, Department of Electrical Engineering, Ahvaz Branch, Islamic Azad University, Ahvaz, Iran

<sup>3</sup> Department of Chemistry, Shahid Rajaei Teacher Training University, Tehran, Iran; j.beheshtian@gmail.com

<sup>4</sup> Center of Emergent Functional Matter Science, National Yang-Ming Chiao Tung University, Hsinchu 00093, Taiwan

\* Correspondence: m.seyedtalebi@nycu.edu.tw (S.M.S.-T.); diau@nycu.edu.tw (E.W.-G.D.)

**Citation:** Seyed-Talebi, S.M.; Cheraghizade, M.; Beheshtian, J.; Kuan, C.H.; Diau, E.W.G. Electrodeposition of  $\text{Co}_x\text{NiV}_y\text{O}_z$  Ternary Nanopetals on Bare and rGO-Coated Nickel Foam for High-Performance Supercapacitor Application. *Nanomaterials* **2022**, *12*, 1894. <https://doi.org/10.3390/nano12111894>

4

Academic Editor(s): Jung Woo Lee

Received: 06 May 2022

Accepted: 28 May 2022

Published: 31 May 2022

**Publisher's Note:** MDPI stays neutral with regard to jurisdictional claims in published maps and institutional affiliations.

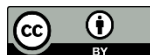

**Copyright:** © 2022 by the authors. Submitted for possible open access publication under the terms and conditions of the Creative Commons Attribution (CC BY) license (<https://creativecommons.org/licenses/by/4.0/>).

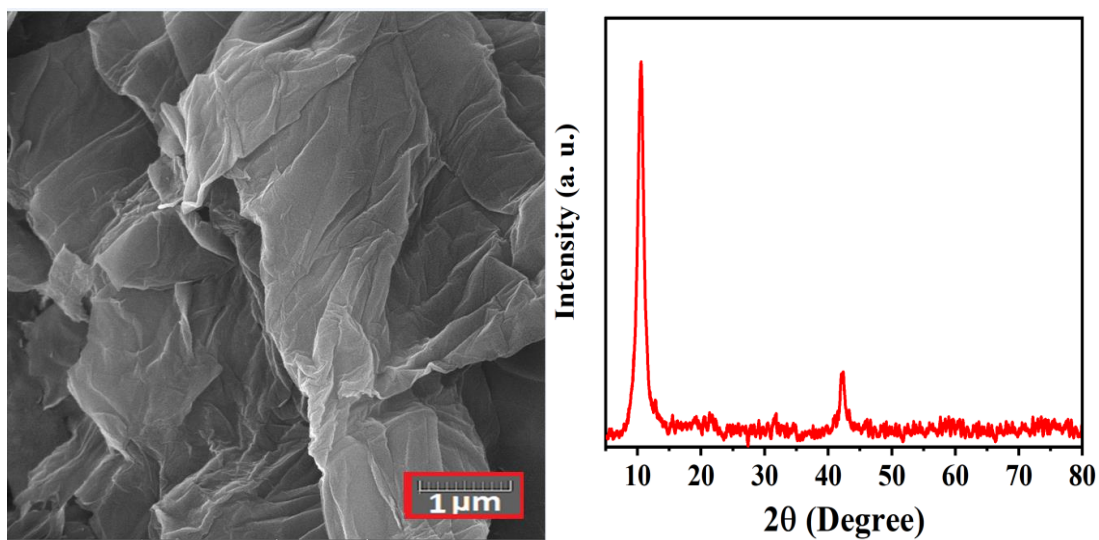

**Figure S1.** (left) FE-SEM image and (right) XRD pattern of synthesized graphene oxide using modified Hummers method.

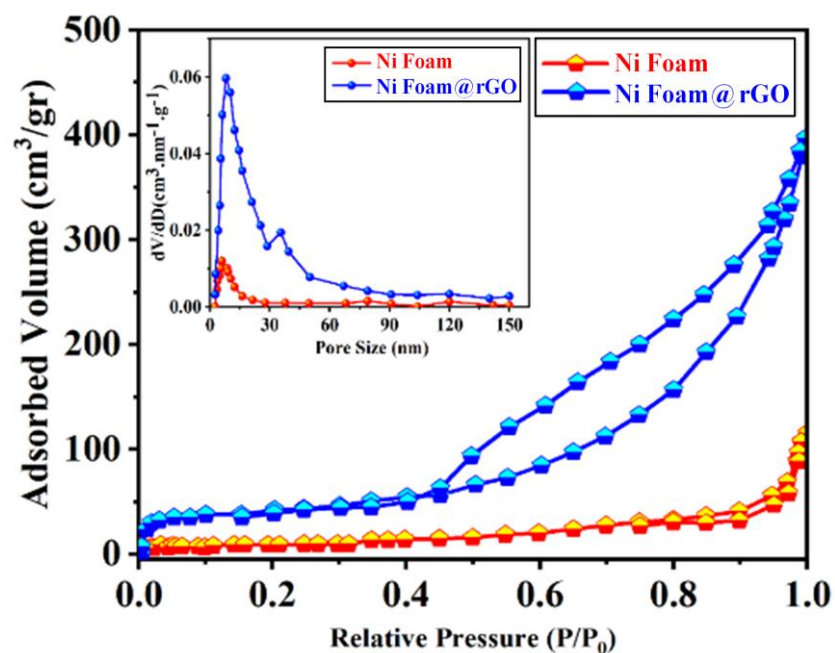

**Figure S2.** BET surface areas and corresponding distributions of Barrett-Joyner-Halenda (BJH) pore size of coated electrode materials onto Ni Foam and Ni Foam@rGO substrates.

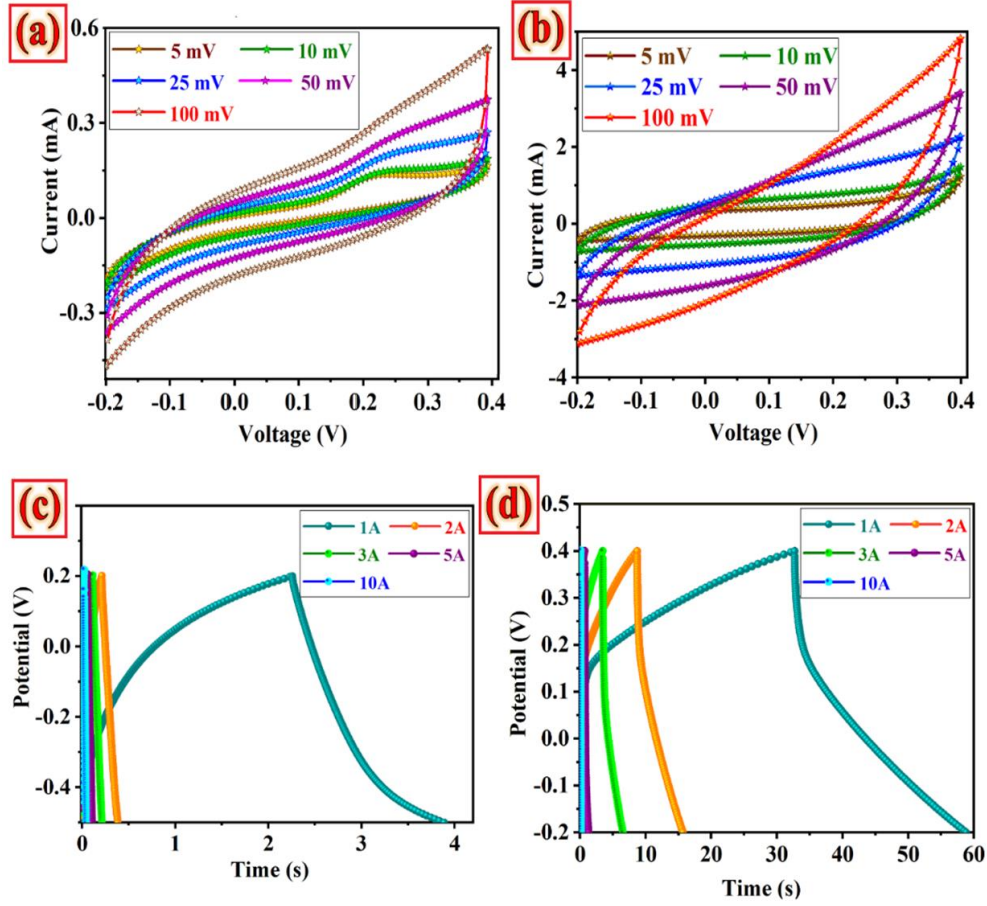

**Figure S3.** CV curves of typical (a) Ni Foam substrate, (b) Ni Foam@rGO substrate tested in KOH electrolyte (1.0 M) at scan rates ranging from 5 to 100  $\text{mV s}^{-1}$ . Galvanostatic charging-discharging (GCD) curves of a typical (c) Ni Foam substrate, (d) Ni Foam@rGO substrate at current density ranging from 2 to 150  $\text{A g}^{-1}$  in KOH electrolyte (1.0 M).

**Table S1.** Calculated specific capacitance values of bare, and rGO-coated nickel-foam substrate from GCD tests.

| Current              | density / $\text{A.g}^{-1}$ | 1     | 2     | 3    | 5    | 10   |
|----------------------|-----------------------------|-------|-------|------|------|------|
| Specific capacitance | Ni Foam                     | 2.63  | 0.48  | 0.47 | 0.35 | 0.18 |
|                      | Ni Foam@rGO                 | 39.88 | 23.26 | 15.4 | 5.16 | 1.0  |

**Table S2.** Calculated specific capacitance values of  $\text{Co}_x\text{Ni}_{1-x}\text{O}_2$ -based electrodes deposited on bare and rGO-coated nickel-foam substrate from GCD tests.

| Current              | density/ $\text{A.g}^{-1}$ | 2      | 5      | 10     | 15     | 20     | 30     | 50     | 75     | 100   | 150   |
|----------------------|----------------------------|--------|--------|--------|--------|--------|--------|--------|--------|-------|-------|
| Specific capacitance | Ni Foam                    | 300.31 | 281.85 | 263.42 | 157.92 | 110.57 | 99.00  | 72.14  | 26.73  | 5.71  | 2.14  |
|                      | Ni Foam@rGO                | 701.08 | 613.42 | 584.28 | 503.57 | 444.85 | 348.85 | 237.85 | 157.50 | 25.71 | 17.14 |
